# Supplementary material for: Molecular insights into the urea–choline-O-sulfate interactions in aqueous solution
Source: Royal Society of Chemistry journal article supplement (doi:10.1039/d1cp02821a), 2021-01-01
Supplement: d1cp02821a1.pdf [file d1cp02821a1.pdf]

## Supplementary Material

### Molecular Insights into the Urea-Choline-*O*-sulfate Interactions in Aqueous Solution

Srijita Paul and Sandip Paul\*

*Department of Chemistry, Indian Institute of Technology, Guwahati Assam, India-781039*

(Dated: September 8, 2021)

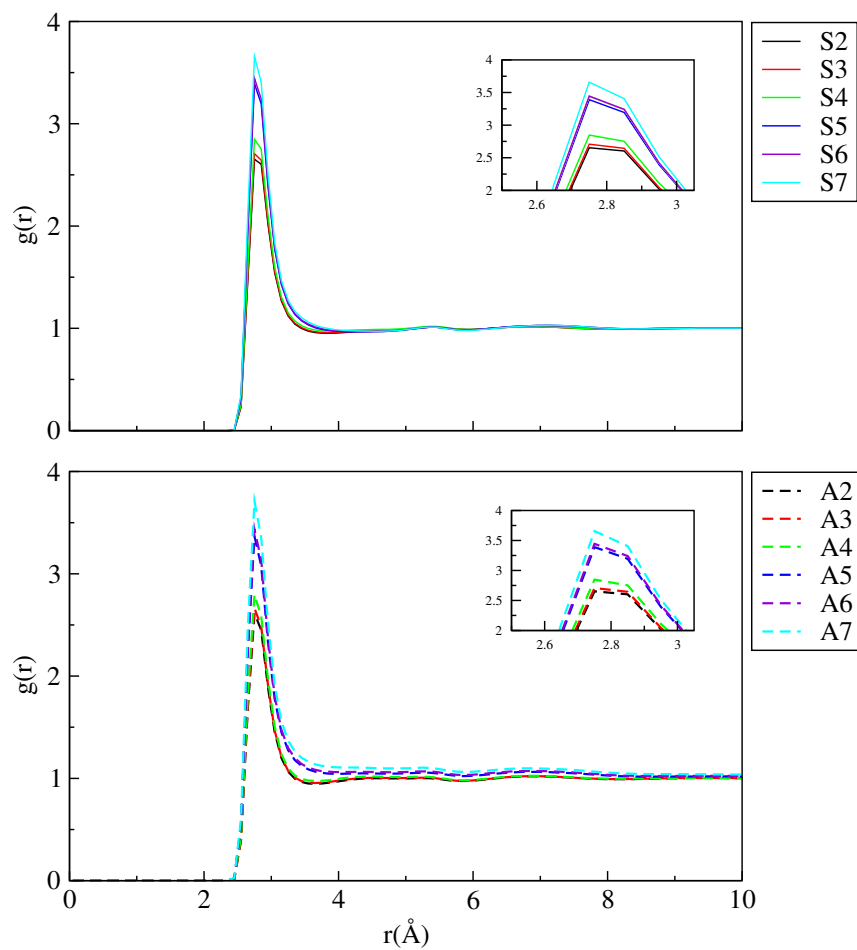

FIG. S1:  $O_W-O_W$  rdf plots for 0.3 M COS (systems S2 and A2), 0.5 M COS (systems S3 and A3), 1.0 M COS (systems S4 and A4) and 0.3 M COS + urea (systems S5 and A5), 0.5 M COS + urea (systems S6 and A6) and 1.0 M COS + urea (systems S7 and A7) for CHARMM and GAFF parameters.

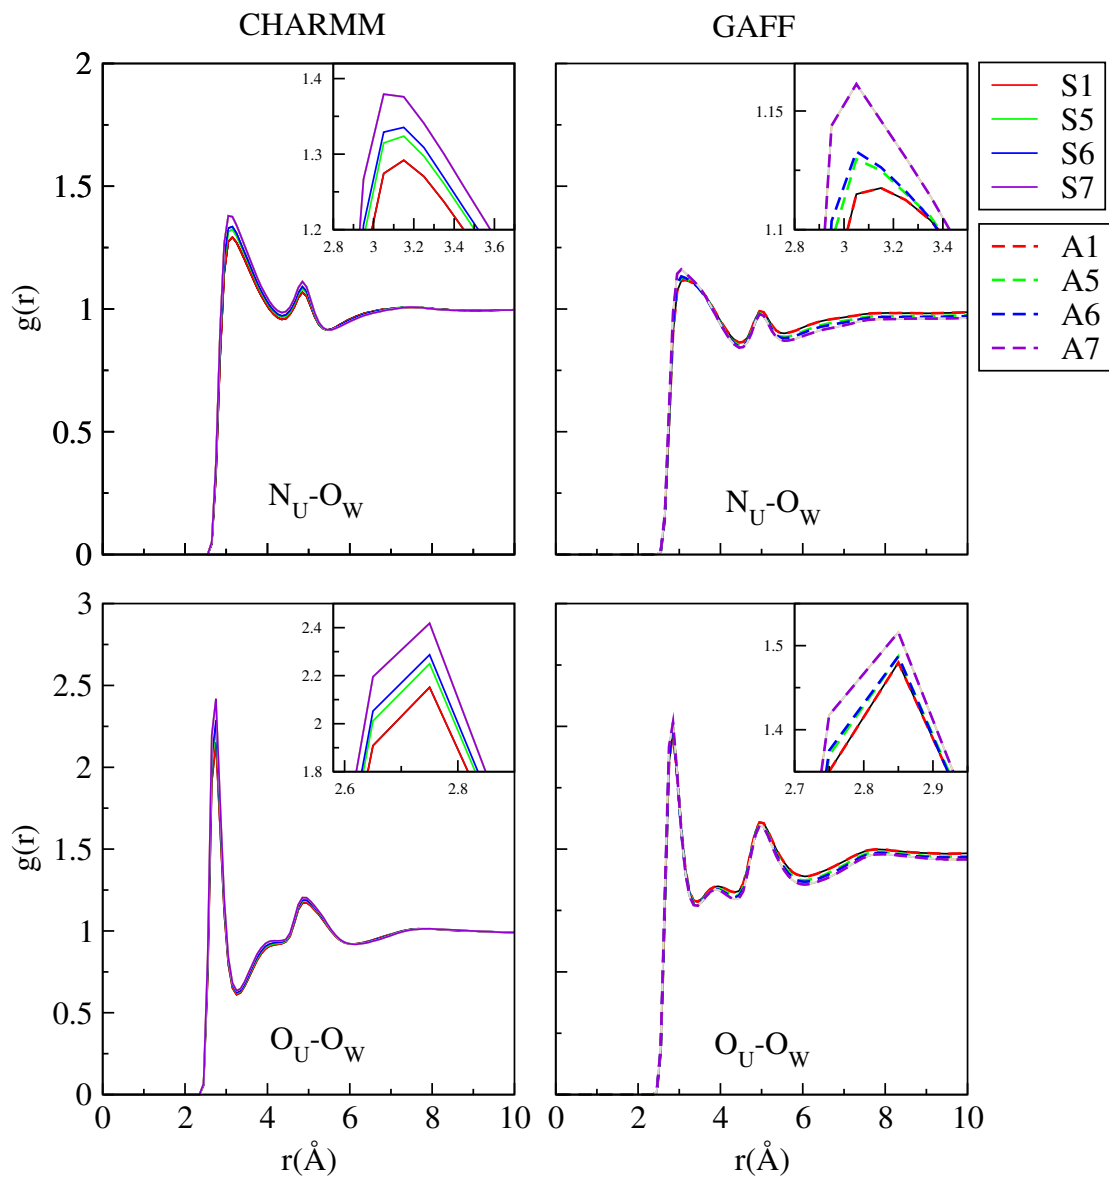

FIG. S2: Urea-water ( $N_U-O_W$  and  $O_U-O_W$ ) rdf plots for 8.0 M urea systems (S1 and A1), 0.3 M COS + urea systems (S5 and A5), 0.5 M COS + urea systems (S6 and A6) and 1.0 M COS + urea systems (S7 and A7). The left and right panels denotes the systems with CHARMM and GAFF parameters respectively.

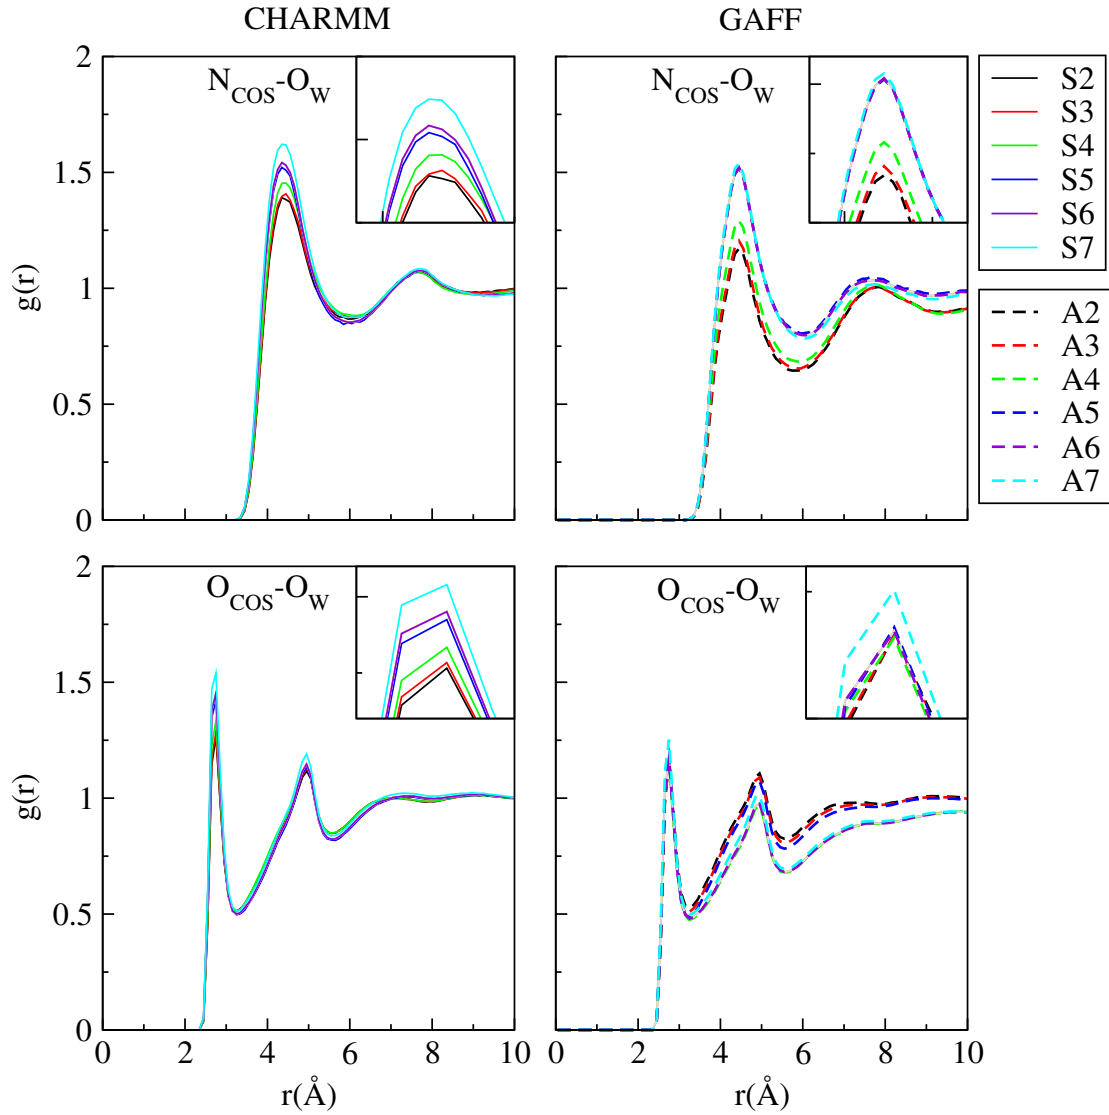

FIG. S3: Radial distribution functions of  $N_{\text{COS}}-O_{\text{W}}$  and  $O_{\text{COS}}-O_{\text{W}}$  for 0.3 M COS (system S2 and A2), 0.5 M COS (systems S3 and A3), 1.0 M COS (systems S4 and A4) and 0.3 M COS + urea (systems S5 and A5), 0.5 M COS + urea (systems S6 and A6), 1.0 M COS + urea (systems S7 and A7). Left panel is for CHARMM parameter systems and right panel is for GAFF parameter systems.

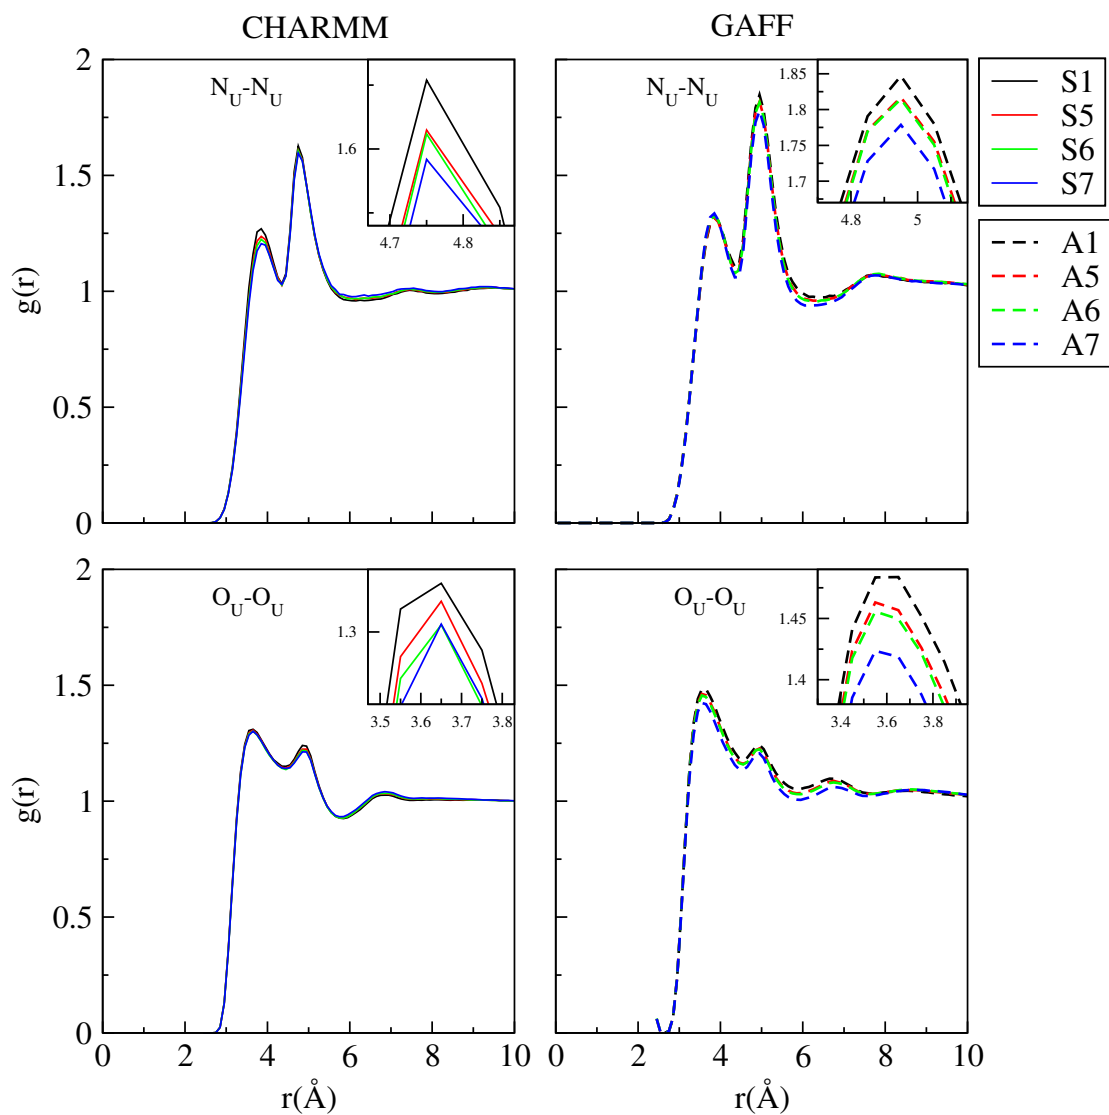

FIG. S4: Radial distribution functions of  $N_U-N_U$  and  $O_U-O_U$  for 8.0 M urea solution (systems S1 and A1) and 0.3 M COS + urea (systems S5 and A5), 0.5 M COS + urea (systems S6 and A6), 1.0 M COS + urea (systems S7 and A7). Left panel is for CHARMM parameter systems and right panel is for GAFF parameter systems.

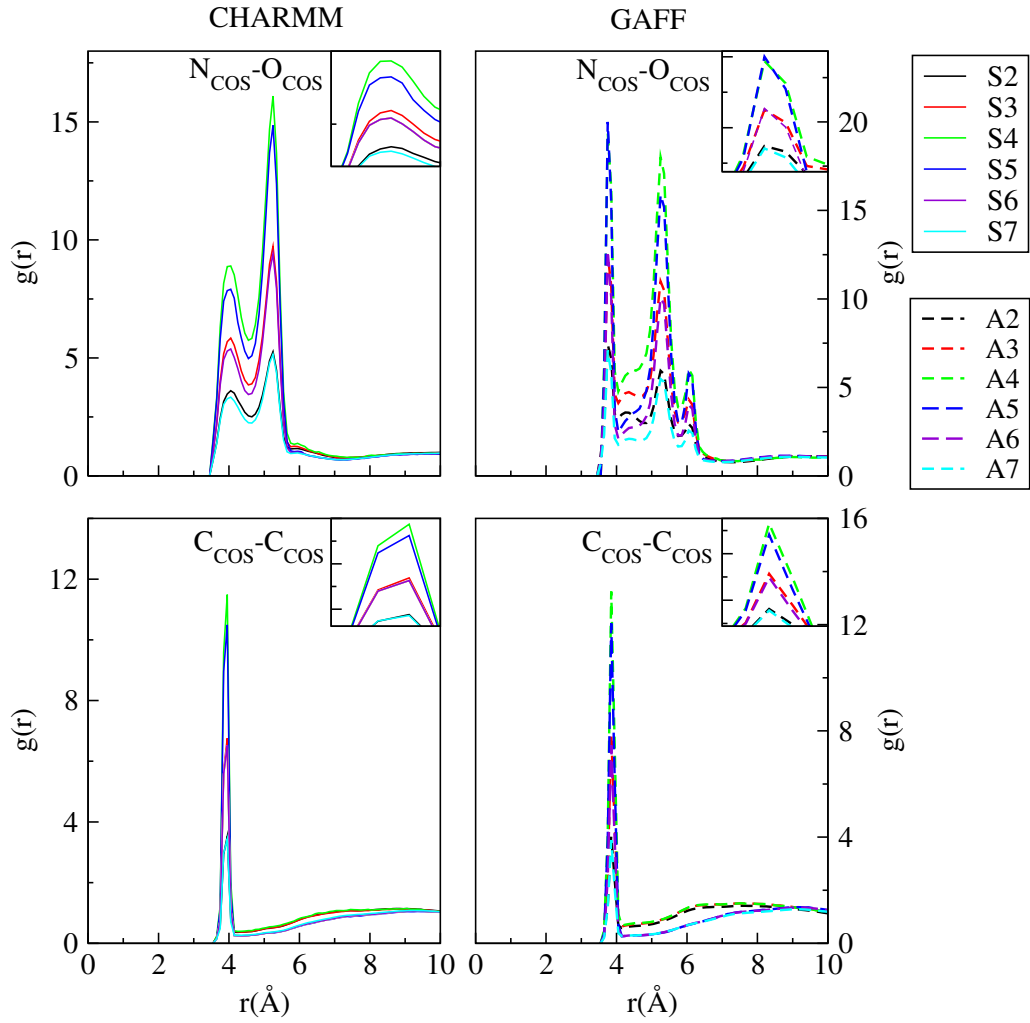

FIG. S5: Radial distribution functions of  $N_{\text{COS}}-O_{\text{COS}}$  and  $C_{\text{COS}}-C_{\text{COS}}$  for 0.3 M COS (systems S2 and A2), 0.5 M COS (systems S3 and A3), 1.0 M COS (systems S4 and A4) and 0.3 M COS + urea (systems S5 and A5), 0.5 M COS + urea (systems S6 and A6), 1.0 M COS + urea (systems S7 and A7). Left panel is for CHARMM parameter systems and right panel is for GAFF parameter systems.

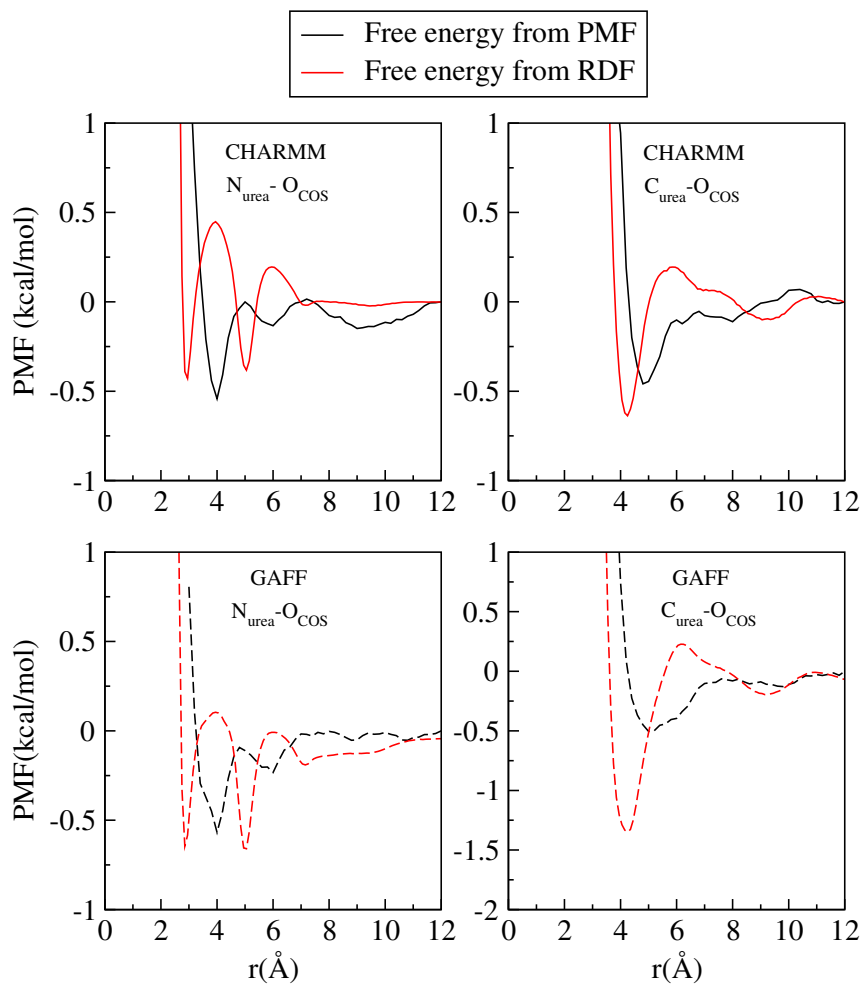

FIG. S6: Free energy of separation between  $N_{\text{urea}}$  and  $O_{\text{COS}}$  and  $C_{\text{urea}}$  and  $N_{\text{COS}}$  for systems with 1.0 M COS + urea at 310 K (systems S7 and A7). Upper panel is for CHARMM parameter systems and lower panel is for GAFF parameter systems.

| System | cn-urea-water | System | cn-urea-water |
|--------|---------------|--------|---------------|
| S1     | 9.10 (5.82)   | A1     | 8.47 (5.53)   |
| S5     | 8.27 (4.80)   | A5     | 7.60 (4.50)   |
| S6     | 8.22 (4.68)   | A6     | 7.52 (4.37)   |
| S7     | 7.47 (3.81)   | A7     | 6.80 (3.54)   |
| S7a    | 7.36 (3.61)   | A7a    | 6.37 (3.36)   |

TABLE S1: Coordination number of water around urea. The normalised values with respect to the density of water in the pure water system are given in the parenthesis.

| System | cn-COS-water  | System | cn-COS-water  |
|--------|---------------|--------|---------------|
| S2     | 32.52 (31.54) | A2     | 31.51 (30.22) |
| S3     | 31.20 (29.02) | A3     | 30.01 (26.76) |
| S4     | 28.57 (24.85) | A4     | 26.73 (23.45) |
| S5     | 21.60 (12.53) | A5     | 17.88 (10.58) |
| S6     | 21.10 (12.03) | A6     | 17.44 (10.14) |
| S7     | 18.97 (9.67)  | A7     | 15.91 (8.28)  |
| S7a    | 18.28 (8.96)  | A7a    | 15.71 (7.85)  |

TABLE S2: Coordination number of water around COS. The normalised values with respect to the density of water in the pure water system are given in the parenthesis.

---

\* Electronic address: [sandipp@iitg.ernet.in](mailto:sandipp@iitg.ernet.in)



| System | urea-water (vdW)    | urea-water (elec)    |
|--------|---------------------|----------------------|
| S1     | -1.04 ( $\pm$ 0.02) | -18.97 ( $\pm$ 0.13) |
| S7     | -1.67 ( $\pm$ 0.03) | -23.47 ( $\pm$ 0.17) |
| A1     | -0.97 ( $\pm$ 0.01) | -15.17 ( $\pm$ 0.11) |
| A7     | -1.52 ( $\pm$ 0.03) | -19.47 ( $\pm$ 0.16) |
| System | COS-water (vdW)     | COS-water (elec)     |
| S4     | -4.47 ( $\pm$ 0.07) | -60.32 ( $\pm$ 0.38) |
| S7     | -8.75 ( $\pm$ 0.09) | -94.55 ( $\pm$ 0.61) |
| A4     | -3.94 ( $\pm$ 0.04) | -46.65 ( $\pm$ 0.43) |
| A7     | -8.72 ( $\pm$ 0.07) | -79.14 ( $\pm$ 0.52) |
| System | water-water (vdW)   | water-water (elec)   |
| S0     | 1.54 ( $\pm$ 0.03)  | -7.35 ( $\pm$ 0.08)  |
| S1     | 1.17 ( $\pm$ 0.01)  | -7.90 ( $\pm$ 0.06)  |
| S2     | 1.03 ( $\pm$ 0.02)  | -7.96 ( $\pm$ 0.04)  |
| S3     | 1.08 ( $\pm$ 0.03)  | -8.39 ( $\pm$ 0.10)  |
| S4     | 1.11 ( $\pm$ 0.03)  | -8.98 ( $\pm$ 0.08)  |
| S5     | 0.96 ( $\pm$ 0.02)  | -9.65 ( $\pm$ 0.07)  |
| S6     | 0.78 ( $\pm$ 0.01)  | -10.38 ( $\pm$ 0.05) |
| S7     | 0.72 ( $\pm$ 0.01)  | -10.68 ( $\pm$ 0.04) |
| S7a    | 0.74 ( $\pm$ 0.01)  | -10.21 ( $\pm$ 0.07) |
| A0     | 1.41 ( $\pm$ 0.03)  | -7.30 ( $\pm$ 0.04)  |
| A1     | 1.27 ( $\pm$ 0.02)  | -7.71 ( $\pm$ 0.06)  |
| A2     | 1.11 ( $\pm$ 0.02)  | -7.88 ( $\pm$ 0.08)  |
| A3     | 1.19 ( $\pm$ 0.01)  | -8.28 ( $\pm$ 0.05)  |
| A4     | 1.23 ( $\pm$ 0.02)  | -8.43 ( $\pm$ 0.05)  |
| A5     | 1.01 ( $\pm$ 0.02)  | -9.32 ( $\pm$ 0.07)  |
| A6     | 0.93 ( $\pm$ 0.01)  | -10.35 ( $\pm$ 0.08) |
| A7     | 0.87 ( $\pm$ 0.01)  | -10.80 ( $\pm$ 0.04) |
| A7a    | 0.92 ( $\pm$ 0.01)  | -10.72 ( $\pm$ 0.09) |

TABLE S3: vdW and electrostatic interaction energies between urea and water (per urea molecules) for systems S1, A1 (8 M urea) and S7, A7 (1.0 M COS + 8 M urea); between COS and water for systems S4, A4 (1.0 M COS) and S7, A7 (1.0 M COS + 8 M urea); and between water-water for all the systems studied here (systems S0, A0 to S7a, A7a). Energies are expressed in kcal/mol unit. Errors are given in the parenthesis.
